# Supplementary material
Source: MDPI journal article supplement (https://www.mdpi.com/1996-1073/16/19/6956)
Supplement: s1 [file s1]

## Supplementary material

**Table S1.** Emission model input (COPERT): comparison between the existing fleet of buses (left) and the newly replaced buses (right), featuring fundamental factors such as euro standard, manufacturing year, and curb weight.

| Former Bus Model | Manufacturing Year | Standard | Curb Weight (t) | Substituted New Bus Model | Manufacturing Year | Standard | Curb Weight (t) |
|------------------|--------------------|----------|-----------------|---------------------------|--------------------|----------|-----------------|
| 1                | 1996               | -        | 10.5            | 7                         | 2018               | EURO VI  | 10.6            |
| 1                | 2000               | -        | 10.5            | 7                         | 2018               | EURO VI  | 10.6            |
| 1                | 2000               | -        | 10.5            | 7                         | 2018               | EURO VI  | 10.6            |
| 1                | 2000               | -        | 10.5            | 7                         | 2018               | EURO VI  | 10.6            |
| 1                | 2000               | -        | 10.5            | 7                         | 2018               | EURO VI  | 10.6            |
| 1                | 1997               | -        | 10.5            | 7                         | 2018               | EURO VI  | 10.6            |
| 1                | 1995               | -        | 10.5            | 7                         | 2018               | EURO VI  | 10.6            |
| 1                | 1995               | -        | 10.5            | 7                         | 2018               | EURO VI  | 10.6            |
| 1                | 2000               | -        | 10.5            | 7                         | 2018               | EURO VI  | 10.6            |
| 1                | 2000               | -        | 10.5            | 7                         | 2018               | EURO VI  | 10.6            |
| 1                | 1997               | -        | 10.5            | 7                         | 2018               | EURO VI  | 10.6            |
| 1                | 2001               | -        | 10.5            | 7                         | 2018               | EURO VI  | 10.6            |
| 1                | 2001               | -        | 10.5            | 7                         | 2018               | EURO VI  | 10.6            |
| 1                | 1997               | -        | 10.5            | 7                         | 2018               | EURO VI  | 10.6            |
| 1                | 1999               | -        | 10.5            | 7                         | 2018               | EURO VI  | 10.6            |
| 1                | 1998               | -        | 10.5            | 7                         | 2018               | EURO VI  | 10.6            |
| 1                | 2001               | -        | 10.5            | 7                         | 2018               | EURO VI  | 10.6            |
| 1                | 1998               | -        | 10.5            | 7                         | 2018               | EURO VI  | 10.6            |
| 1                | 2001               | -        | 10.5            | 7                         | 2018               | EURO VI  | 10.6            |
| 1                | 1995               | -        | 10.5            | 7                         | 2018               | EURO VI  | 10.6            |
| 1                | 1998               | -        | 10.5            | 7                         | 2018               | EURO VI  | 10.6            |
| 1                | 1999               | -        | 10.5            | 7                         | 2018               | EURO VI  | 10.6            |
| 1                | 1998               | -        | 10.5            | 7                         | 2018               | EURO VI  | 10.6            |
| 1                | 1998               | -        | 10.5            | 7                         | 2018               | EURO VI  | 10.6            |
| 1                | 2001               | -        | 10.5            | 7                         | 2019               | EURO VI  | 10.6            |
| 1                | 2002               | -        | 10.5            | 7                         | 2019               | EURO VI  | 10.6            |
| 1                | 2002               | -        | 10.5            | 7                         | 2019               | EURO VI  | 10.6            |
| 1                | 2002               | -        | 10.5            | 7                         | 2019               | EURO VI  | 10.6            |
| 1                | 2002               | -        | 10.5            | 7                         | 2019               | EURO VI  | 10.6            |
| 2                | 1999               | EURO II  | 7.7             | 7                         | 2019               | EURO VI  | 10.6            |
| 2                | 1999               | EURO II  | 7.7             | 7                         | 2019               | EURO VI  | 10.6            |
| 2                | 1999               | EURO II  | 7.7             | 7                         | 2019               | EURO VI  | 10.6            |
| 2                | 1999               | EURO II  | 7.7             | 7                         | 2019               | EURO VI  | 10.6            |
| 2                | 1999               | EURO II  | 7.7             | 7                         | 2019               | EURO VI  | 10.6            |
| 3                | 1999               | EURO II  | 11.8            | 7                         | 2019               | EURO VI  | 10.6            |
| 3                | 2000               | EURO II  | 11.8            | 7                         | 2019               | EURO VI  | 10.6            |
| 3                | 1999               | EURO II  | 11.8            | 7                         | 2019               | EURO VI  | 10.6            |
| 3                | 1999               | EURO II  | 11.8            | 7                         | 2019               | EURO VI  | 10.6            |
| 3                | 2000               | EURO II  | 11.8            | 7                         | 2019               | EURO VI  | 10.7            |
| 3                | 1999               | EURO II  | 11.8            | 7                         | 2019               | EURO VI  | 10.7            |
| 3                | 2000               | EURO II  | 11.8            | 7                         | 2019               | EURO VI  | 10.7            |
| 3                | 2000               | EURO II  | 11.8            | 7                         | 2019               | EURO VI  | 10.7            |
| 3                | 1999               | EURO II  | 11.8            | 7                         | 2019               | EURO VI  | 10.7            |
| 3                | 2000               | EURO II  | 11.8            | 7                         | 2019               | EURO VI  | 10.7            |

|   |      |         |      |   |      |         |      |
|---|------|---------|------|---|------|---------|------|
| 4 | 2001 | EURO II | 8.5  | 7 | 2019 | EURO VI | 10.7 |
| 4 | 2001 | EURO II | 8.5  | 7 | 2019 | EURO VI | 10.7 |
| 4 | 2001 | EURO II | 8.5  | 7 | 2019 | EURO VI | 10.7 |
| 4 | 2001 | EURO II | 8.5  | 7 | 2019 | EURO VI | 10.7 |
| 4 | 2001 | EURO II | 8.5  | 7 | 2019 | EURO VI | 10.7 |
| 5 | 2000 | EURO II | 10.9 | 7 | 2019 | EURO VI | 10.7 |
| 6 | 2000 | EURO II | 10.9 | 7 | 2019 | EURO VI | 10.7 |
| 6 | 2000 | EURO II | 10.9 | 7 | 2019 | EURO VI | 10.7 |

---
